# Supplementary material for: Heterogeneity of the effect of the COVID-19 pandemic on the incidence of Metabolic Syndrome onset at a Japanese campus
Source: PeerJ journal article supplement (doi:10.7717/peerj.17013), 2024-04-05

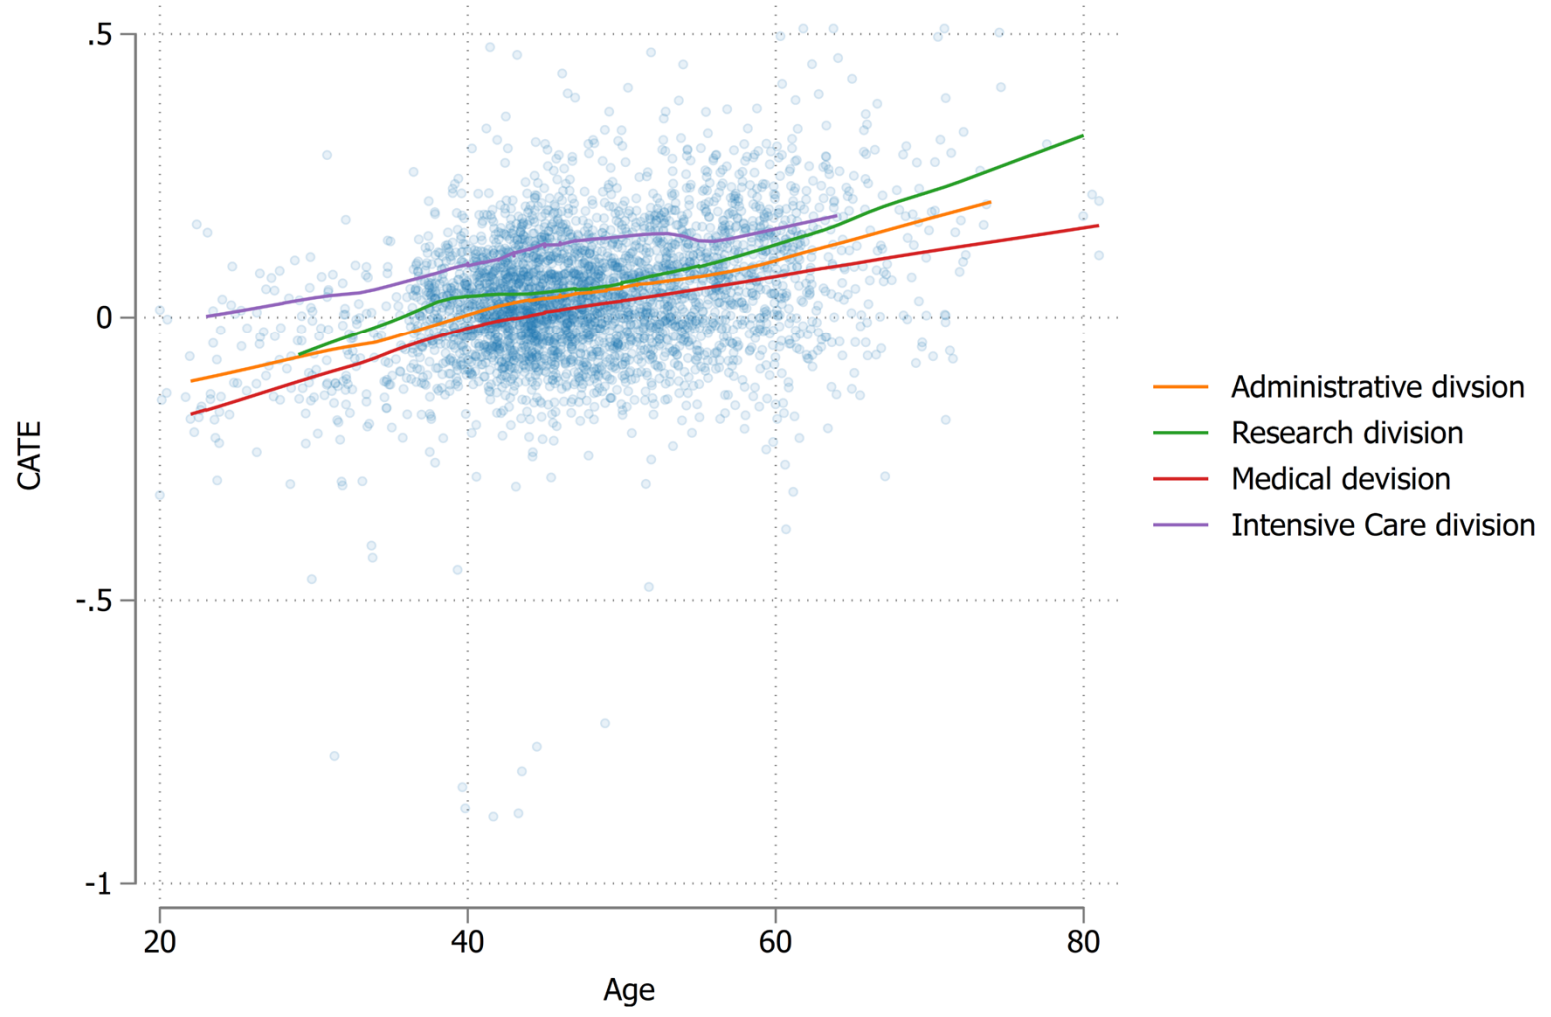

Supplement: Supplemental_Figure_S2.pdf [file Supplemental_Figure_S2.pdf]
